# Supplementary material for: COVID-19 Antibody Detecting Rapid Diagnostic Tests Show High Cross-Reactivity When Challenged with Pre-Pandemic Malaria, Schistosomiasis and Dengue Samples
Source: MDPI journal article supplement (doi:10.3390/diagnostics11071163), 2021-06-25
Supplement: s1 [file s1]

*Supplementary Material*

# **COVID-19 Antibody Detecting Rapid Diagnostic Tests Show High Cross-Reactivity When Challenged with Pre-Pandemic Malaria, Schistosomiasis and Dengue Samples**

**Fien Vanroye <sup>1,\*</sup>, Dorien Van den Bossche <sup>1</sup>, Isabel Brosius <sup>1</sup>, Bieke Tack <sup>1,2</sup>, Marjan Van Esbroeck <sup>1</sup> and Jan Jacobs <sup>1,2</sup>**

<sup>1</sup> Department of Clinical Sciences, Institute of Tropical Medicine, 2000 Antwerp, Belgium; dvandenbossche@itg.be (D.V.d.B.); ibrosius@itg.be (I.B.); btack@itg.be (B.T.); mvesbroeck@itg.be (M.V.E.); jjacobs@itg.be (J.J.)

<sup>2</sup> Department of Microbiology, Immunology and Transplantation, KU Leuven, 3000 Leuven, Belgium

\* Correspondence: fvanroye@itg.be

**Supplementary Table S1. Extra information of different COVID-19 antibody detecting products and EIA according to manufacturer, Instructions for Use and product regulation.** Data are those obtained at selection and procurement (August-September 2020). Unless otherwise stated, data are those from the Instructions for Use or the labeling of the product. Wantai RDT product has a single test line, no information was given about the nature of the antibody detected (ND = no data). Claimed specimen: S = serum, P = plasma, WB = whole blood. Sensitivity and specificity results according to FIND independent SARS-CoV-2 Ab evaluations are found on <https://www.finddx.org/sarscov2-eval-antibody/> (NA = not applicable). Products with "\*" had no detecting antigen mentioned in the instructions for use, information was retrieved from the manufacturer or the FDA EUA or WHO EUL, unless otherwise stated (column antigen used for detection). Abbreviations: EIA = enzyme immunoassay, CE = Conformité Européenne (CE Mark), FDA EUA = U.S. Food and Drug Administration Emergency Use Authorization, WHO EUL = World Health Organization Emergency Use Listing, FAGG = Federal Agency for Medicines and Health Products, FIND = Foundation for Innovative New Diagnostics, IFU = Instructions for Use. Products with "\*\*\*" did not mention the use of fingerstick blood as a possible specimen. Cellex recommend not to use fingerstick specimens, as it is not validated. Information about regulatory status was obtained during the procurement of the RDT products in August 2020. Products with "" mentioned in the instructions for use not to use frozen whole blood to perform RDT testing.

| Product                                 | Manufacturer     | City (Country)      | Antigen used for detection | IgG/IgM | Claimed specimen     | Claimed sensitivity     | Claimed specificity   | Product code | Lot number  | Shelf life upon reception (months) | IFU version | Date IFU   | Price/test (in euros, taxes not included) | Regulatory authorization (CE, FDA, FAGG) | Listed on WHO EUL | FIND | Results FIND sensitivity | Results FIND specificity |
|-----------------------------------------|------------------|---------------------|----------------------------|---------|----------------------|-------------------------|-----------------------|--------------|-------------|------------------------------------|-------------|------------|-------------------------------------------|------------------------------------------|-------------------|------|--------------------------|--------------------------|
| Wantai SARS-CoV-2 Ab Rapid Test         | Wantai Bio-Pharm | Beijing (China)     | S *                        | ND      | S/P/WB <sup>1</sup>  | 99,7%                   | 98,9%                 | WJ-2750      | JNB20200304 | 6                                  | 20/04       | 26/04/2020 | 5,90                                      | CE, FDA                                  | Yes               | Yes  | Pending Finalization     |                          |
| COVID-19 IgG/IgM Rapid Test Cassette    | Healgen          | Houston (USA)       | S *                        | IgG/IgM | S/P/WB <sup>1</sup>  | IgG:97,2%<br>IgM: 87,9% | IgG:100%<br>IgM: 100% | GCCCOV-402a  | 2003309     | 17                                 | B21854-02   | 4/03/2020  | 11,25                                     | CE                                       | No                | No   | NA                       | NA                       |
| TODA CORNODIAG +                        | Todapharma       | Strasbourg (France) | N *                        | IgG/IgM | S/P/WB               | IgG:100%<br>IgM:100%    | IgG:100%<br>IgM:100%  | 2275+/25     | 2005081A    | 19                                 | Version 3   | 03/08/2020 | 9,45                                      | CE                                       | No                | No   | NA                       | NA                       |
| Rapid 2019-nCoV IgG/IgM Combo Test Card | Boson Biotech    | Fujian (China)      | N *                        | IgG/IgM | S/P/WB <sup>**</sup> | 87,8%                   | 99,0%                 | 1N38C2       | 20031926    | 11                                 | 81985       | 20/03/2020 | 8,75                                      | CE                                       | No                | Yes  | NA                       | NA                       |

|                                                          |                        |                      |                     |         |                        |                         |                         |                |                 |                          |                             |            |       |                |     |     |           |       |
|----------------------------------------------------------|------------------------|----------------------|---------------------|---------|------------------------|-------------------------|-------------------------|----------------|-----------------|--------------------------|-----------------------------|------------|-------|----------------|-----|-----|-----------|-------|
| <b>SARS-CoV-2 IgM/IgG Antibody Test Kit</b>              | Biohit                 | Hefei (China)        | N *                 | IgG/IgM | S/P/WB                 | IgG:97,5%<br>IgM: 97,5% | IgG:100%<br>IgM: 99,5%  | NA             | SA200401        | 6                        | Version02                   | 22/02/2020 | 2,55  | no CE,<br>FDA  | Yes | Yes | NA        | NA    |
| <b>PanBio COVID-19 IgG/IgM Rapid test device</b>         | Abbott                 | Jena (Germany)       | N *                 | IgG/IgM | S/P/WB <sup>1</sup>    | 97,8%                   | 92,8%                   | ICO-T402       | COV0052<br>023  | 7                        | NA                          | 6/06/2020  | 6,00  | CE,<br>FAGG    | No  | No  | Withdrawn |       |
| <b>QuickZen COVID-19 IgM/IgG</b>                         | ZenTech                | Angleur (Belgium)    | RBD                 | IgG/IgM | S/P/WB <sup>1</sup>    | IgG:100%<br>IgM:97%     | IgG:97%<br>IgM:99,1%    | SLW-25         | SLW25-<br>007A  | 18                       | S-LW-<br>MZ-002             | 1/04/2020  | 9,80  | no CE,<br>FAGG | No  | Yes | 55.1%     | 99.0% |
| <b>StrongStep SARS-CoV-2 IgM/IgG Antibody Rapid Test</b> | Liming Bio             | Jiangsu (China)      | N + S *             | IgG/IgM | S/P/WB <sup>1</sup> ** | IgG:93,3%<br>IgM: 98,7% | IgG:98,7%<br>IgM: 100%  | 502090         | 2006003         | 19                       | V4.0                        | 30/05/2020 | 2,55  | no CE,<br>FAGG | No  | Yes | NA        | NA    |
| <b>2019-nCoV IgG/IgM Rapid Test</b>                      | Dynamiker              | Tianjin (China)      | N + S               | IgG/IgM | S/P/WB                 | 93,2%                   | 95,3%                   | DNK-1419-<br>1 | 200501          | 12                       | NA                          | NA         | 11,00 | CE,<br>FAGG    | No  | Yes | 69.7%     | 95.3% |
| <b>qSARS-COV-2 IgG/IgM Rapid Test</b>                    | Cellex                 | North Carolina (USA) | N + S *             | IgG/IgM | S/P/WB <sup>1</sup> ** | 93,8%                   | 96%                     | 5515C025       | 20210           | 9                        | NA                          | NA         | 17,00 | CE             | No  | Yes | Withdrawn |       |
| <b>COVID-19 IgG/IgM Rapid Test Cassette</b>              | SureScreen Diagnostics | Derby (UK)           | N +<br>RBD *        | IgG/IgM | S/P/WB <sup>1</sup>    | IgG:100%<br>IgM: 91,8%  | IgG:99,5%<br>IgM: 99,2% | COVID19C       | COV2004<br>0037 | 17                       | RP327102                    | 5/03/2020  | 7,36  | CE,<br>FAGG    | No  | No  | NA        | NA    |
| <b>COVID-19 IgG/IgM Detection Kit (Colloidal Gold)</b>   | Singuway               | Shenzhen (China)     | N +<br>RBD *        | IgG/IgM | S/P/WB <sup>1</sup> ** | ≥95-100%                | 100%                    | NA             | 200404A         | no<br>expir<br>y<br>date | 402-<br>000032-<br>00V1.2en | 28/03/2020 | 9,50  | no CE          | No  | No  | NA        | NA    |
| <b>COVID-19 IgM/IgG Ab Test Cassette</b>                 | Multi-G                | Antwerpen (Belgium)  | N +<br>RBD +<br>S * | IgG/IgM | S/P/WB <sup>1</sup> ** | IgG:93%<br>IgM: 82%     | IgG:96%<br>IgM: 97,5%   | MGS            | COV1252<br>006A | 8                        | Rev01<br>20200623           | 23/06/2020 | 5,00  | CE             | No  | Yes | NA        | NA    |

|                                |                                                        |                   |       |     |                  |      |      |                      |          |    |         |           |            |    |    |    |    |    |
|--------------------------------|--------------------------------------------------------|-------------------|-------|-----|------------------|------|------|----------------------|----------|----|---------|-----------|------------|----|----|----|----|----|
| <b>2019 nCOV IgG SPIKE EIA</b> | Launch<br>Diagnostics<br>Limited/Di<br>aPro IgG<br>EIA | Milano<br>(Italy) | S     | IgG | S/P <sup>†</sup> | 100% | >98% | COV19Gspi<br>ke.CE/S | 0720     | 12 | rev. 0c | 1/06/2020 | 350,0<br>0 | CE | No | No | NA | NA |
| <b>2019 nCOV IgM EIA</b>       | Launch<br>Diagnostics<br>Limited/Di<br>aPro IgM<br>EIA | Milano<br>(Italy) | N + S | IgM | S/P <sup>†</sup> | 98%  | 98%  | COV19M.C<br>E.192/S  | 0420/2AA | 9  | rev. 2c | 1/06/2020 | 840,0<br>0 | CE | No | No | NA | NA |

**Supplementary Table S2. Classification of Country of Travel or Residence per disease, traveler type and gender.**

Countries are classified according to the United Nations Statistics Division for Geographic Origins ([unstats.un.org/unsd/methodology/m49/](http://unstats.un.org/unsd/methodology/m49/)).

Abbreviations: VFR = visiting friends & relatives.

| Country of Travel or Residence |                    |                | Disease (samples)              |                    |                             |                               | Traveler Type (patients)               |                               |                     | Gender (patients) |                    |    |
|--------------------------------|--------------------|----------------|--------------------------------|--------------------|-----------------------------|-------------------------------|----------------------------------------|-------------------------------|---------------------|-------------------|--------------------|----|
|                                |                    |                | Malaria<br>(n = 153)           | Dengue<br>(n = 20) | Schistosomiasis<br>(n = 23) | Total<br>disease<br>(n = 196) | Expatriates<br>& Travelers<br>(n = 51) | VFR &<br>migrants<br>(n = 66) | No data<br>(n = 79) | Male<br>(n = 124) | Female<br>(n = 72) |    |
| Africa                         | Northern<br>Africa | Morocco        | 1                              | -                  | -                           | 1                             | -                                      | -                             | 1                   | 1                 | -                  |    |
|                                |                    | Sudan          | 1                              | -                  | 1                           | 2                             | 1                                      | 1                             | -                   | 2                 | -                  |    |
|                                |                    | Total          | 2                              | -                  | 1                           | 3                             | 1                                      | 1                             | 1                   | 3                 | -                  |    |
|                                | Sub-Saharan Africa | Eastern Africa | Burundi                        | 1                  | -                           | 2                             | 3                                      | 2                             | -                   | 1                 | -                  | 3  |
|                                |                    |                | Eritrea                        | 1                  | -                           | 1                             | 2                                      |                               | 2                   | -                 | 2                  | -  |
|                                |                    |                | Ethiopia                       | 3                  | -                           | 1                             | 4                                      | 1                             | 3                   | -                 | 3                  | 1  |
|                                |                    |                | Kenya                          | 1                  |                             | -                             | 1                                      | -                             | -                   | 1                 | -                  | 1  |
|                                |                    |                | Madagascar                     | 1                  | -                           | -                             | 1                                      | 1                             | -                   | -                 | 1                  | -  |
|                                |                    |                | Malawi                         | 1                  | -                           | -                             | 1                                      | 1                             | -                   | -                 | 1                  | -  |
|                                |                    |                | Mozambique                     | 1                  | -                           | -                             | 1                                      | -                             | -                   | 1                 | 1                  | -  |
|                                |                    |                | Rwanda                         | 2                  | -                           | 6                             | 8                                      | 6                             | 2                   | -                 | 4                  | 4  |
|                                |                    |                | Somalia                        | -                  | 1                           | -                             | 1                                      | 1                             | -                   | -                 | 1                  | -  |
|                                |                    |                | Uganda                         | 3                  | -                           | -                             | 3                                      | 1                             | 2                   | -                 | 1                  | 2  |
|                                |                    |                | United Republic of<br>Tanzania | 1                  | -                           | -                             | 1                                      | 1                             | -                   | -                 | 1                  | -  |
|                                |                    |                | Total                          | 15                 | 1                           | 10                            | 26                                     | 14                            | 9                   | 3                 | 15                 | 11 |

|        |                    |                |                                  |    |   |   |    |    |    |    |    |    |
|--------|--------------------|----------------|----------------------------------|----|---|---|----|----|----|----|----|----|
| Africa | Sub-Saharan Africa | Middle Africa  | Angola                           | 1  | 1 | 1 | 3  | 1  | 2  | -  | 2  | 1  |
|        |                    |                | Cameroon                         | 16 | - | - | 16 | -  | 5  | 11 | 10 | 6  |
|        |                    |                | Central African Republic         | 1  | - | - | 1  | 1  | -  | -  | 1  | -  |
|        |                    |                | Chad                             | 2  |   | - | 2  | 2  | -  | -  | 1  | 1  |
|        |                    |                | Congo                            | -  | 1 | - | 1  | -  | 1  | -  | 1  | -  |
|        |                    |                | Democratic Republic of the Congo | 28 | - | - | 28 | 8  | 12 | 8  | 17 | 11 |
|        |                    |                | Gabon                            | 1  | - | 1 | 2  | -  | -  | 2  | -  | 2  |
|        |                    |                | <i>Total</i>                     | 49 | 2 | 2 | 53 | 12 | 20 | 21 | 32 | 21 |
|        |                    | Western Africa | Benin                            | 2  | - | - | 2  | 1  | -  | 1  | 2  | -  |
|        |                    |                | Burkina Faso                     | 6  | - | - | 6  | 1  | 2  | 3  | 4  | 2  |
|        |                    |                | Côte d'Ivoire                    | 5  | 1 | - | 6  | 2  | 2  | 2  | 4  | 2  |
|        |                    |                | Ghana                            | 16 | - | 4 | 20 | 6  | 5  | 9  | 11 | 9  |
|        |                    |                | Guinea                           | 10 | - | 2 | 12 | -  | 8  | 4  | 9  | 3  |
|        |                    |                | Liberia                          | 3  | - | 1 | 4  | -  | 4  | -  | 2  | 2  |
|        |                    |                | Mali                             | 2  |   | 1 | 3  | -  | 1  | 2  | 2  | 1  |
|        |                    |                | Nigeria                          | 7  | - | - | 7  | -  | 7  | -  | 5  | 2  |
|        |                    |                | Senegal                          | 5  | 1 | 1 | 7  | 1  | 1  | 5  | 5  | 2  |
|        |                    |                | Sierra Leone                     | 2  | - | - | 2  | -  | -  | 2  | 1  | 1  |
|        |                    |                | Togo                             | 3  | - | - | 3  | -  | 2  | 1  | 2  | 1  |
|        |                    |                | <i>Total</i>                     | 61 | 2 | 9 | 72 | 11 | 32 | 29 | 47 | 25 |

|          |                             |                    |                                  |    |   |   |    |   |   |    |    |   |
|----------|-----------------------------|--------------------|----------------------------------|----|---|---|----|---|---|----|----|---|
| Americas | Latin America and Caribbean | Caribbean          | Cuba                             | -  | 1 | - | 1  | 1 | - | -  | -  | 1 |
|          |                             |                    | Haiti                            | -  | 2 | - | 2  | 1 | 1 | -  | 1  | 1 |
|          |                             | Central America    | Mexico                           | -  | 1 | - | 1  | 1 | - | -  | -  | 1 |
|          |                             |                    | Nicaragua                        | -  | 1 | - | 1  | 1 | - | -  | -  | 1 |
|          |                             | South America      | Ecuador                          | -  | 1 | - | 1  | - | - | 1  | -  | 1 |
|          |                             |                    | Suriname                         | -  | 1 |   | 1  | 1 | - | -  | 1  | - |
|          |                             | <i>Total</i>       |                                  | 0  | 7 | 0 | 7  | 5 | 1 | 1  | 2  | 5 |
|          | Asia                        | South-eastern Asia | Cambodia                         | 1  | 1 | - | 2  | - | - | 2  | 1  | 1 |
|          |                             |                    | Indonesia                        | -  | 1 | - | 1  | 1 | - | -  | 1  | - |
|          |                             |                    | Lao People's Democratic Republic | -  | - | 1 | 1  | 1 | - | -  | -  | 1 |
|          |                             |                    | Philippines                      | -  | 1 | - | 1  | 1 | - | -  | 1  | - |
|          |                             |                    | Thailand                         | -  | 2 | - | 2  | 1 | - | 1  | 2  | - |
|          |                             | Southern Asia      | India                            | 6  | 2 | - | 8  | 3 | - | 5  | 6  | 2 |
|          |                             |                    | Pakistan                         | 1  | - | - | 1  | - | - | 1  | 1  | - |
|          |                             |                    | Sri Lanka                        | -  | 1 | - | 1  | - | 1 | -  | 1  | - |
|          |                             | <i>Total</i>       |                                  | 8  | 8 | 1 | 17 | 7 | 1 | 9  | 13 | 4 |
|          |                             | No data            |                                  | 17 | - | - | 17 | 1 | 2 | 14 | 11 | 6 |

**Supplementary Table S3. Pilot testing of the control samples and the invalid test rates per RDT product.**

For Cellex RDT product, only 158 samples were tested; for the DiaPro IgG & IgM EIA product, 94 serum and 17 plasma samples were tested.

Pilot testing: commercial controls were Multichem ID-COVID19G/M control and Multichem ID-COVID19 Neg (ZenTech, Angleur, Belgium). Result (pos/neg) and ratio are given for the patient control and commercial controls tested with DiaPro IgG and IgM EIA. Positive serum patient control was confirmed by in-house SARS-CoV-2 virus neutralization, negative serum patient control was a healthy person tested negative by WANTAI SARS-CoV-2 Ab ELISA (Wantai, Beijing, China). Abbreviations: EIA = enzyme immunoassay Results for IgG and IgM lines are presented as negative (N) and by line intensity: very faint (VF), faint (F), weak (W), medium (M) and strong (S). Invalid testing: types of invalid test results include: red background obscuring the test line (ORB), incomplete migration (MI), no control line visible (NCL), failed migration (FM), patchy broken test line (PL) and strip misplaced in cassette (SM) according to WHO round testing 2018 (<https://www.who.int/malaria/publications/atoz/9789241514965/en/>).

| Product        | Number of samples tested | Number of cross-reactions | Pilot testing control samples |           |                          |           |                            |            |                            |            | Numbers (%) of invalid test results | Type of invalid test result (numbers) |    |     |    |    |    |
|----------------|--------------------------|---------------------------|-------------------------------|-----------|--------------------------|-----------|----------------------------|------------|----------------------------|------------|-------------------------------------|---------------------------------------|----|-----|----|----|----|
|                |                          |                           | Negative patient control      |           | Positive Patient control |           | Multichem negative control |            | Multichem positive control |            |                                     | ORB                                   | MI | NCL | FM | PL | SM |
|                |                          |                           |                               |           |                          |           |                            |            |                            |            |                                     |                                       |    |     |    |    |    |
| Wantai         | 220                      | 85                        | N                             |           | M                        |           | N                          |            | W                          |            | 1 (0.5%)                            | -                                     | -  | -   | -  | 1  | -  |
| Healgen        | 219                      | 67                        | N                             | N         | F                        | S         | N                          | N          | S                          | W          | 2 (0.9%)                            | 2                                     | -  | -   | -  | -  | -  |
| Toda           | 220                      | 10                        | N                             | N         | F                        | VF        | N                          | N          | F                          | VF         | 0                                   | -                                     | -  | -   | -  | -  | -  |
| Boson          | 219                      | 116                       | N                             | N         | M                        | F         | VF                         | N          | M                          | VF         | 3 (1.4%)                            | -                                     | -  | -   | -  | 3  | -  |
| Biohit         | 220                      | 34                        | N                             | N         | W                        | W         | N                          | N          | F                          | VF         | 0                                   | -                                     | -  | -   | -  | -  | -  |
| Panbio         | 220                      | 39                        | N                             | N         | M                        | N         | N                          | N          | W                          | N          | 0                                   | -                                     | -  | -   | -  | -  | -  |
| QuickZen       | 220                      | 24                        | N                             | N         | VF                       | M         | N                          | N          | VF                         | VF         | 42 (19.1%)                          | 39                                    | 1  | -   | -  | 2  | -  |
| StrongStep     | 217                      | 13                        | N                             | N         | W                        | W         | N                          | N          | N                          | N          | 0                                   | -                                     | -  | -   | -  | -  | -  |
| Dynamiker      | 220                      | 73                        | N                             | VF        | W                        | W         | VF                         | VF         | W                          | W          | 8 (3.6%)                            | 5                                     | 1  | -   | -  | -  | 2  |
| Cellex         | 158                      | 7                         | N                             | N         | M                        | W         | N                          | N          | W                          | N          | 7 (4.4%)                            | -                                     | -  | 7   | -  | -  | -  |
| SureScreen     | 220                      | 12                        | N                             | N         | W                        | M         | N                          | N          | S                          | VF         | 5 (2.3%)                            | 5                                     | -  | -   | -  | -  | -  |
| Singuway       | 220                      | 44                        | N                             | N         | N                        | M         | N                          | N          | F                          | F          | 0                                   | -                                     | -  | -   | -  | -  | -  |
| Multi-G        | 220                      | 12                        | N                             | N         | W                        | VF        | N                          | N          | W                          | N          | 4 (1.8%)                            | 3                                     | -  | -   | -  | 25 | -  |
| DiaPro IgG EIA | 111                      | 2                         | neg (0.7)                     | -         | pos (3.2)                | -         | neg (0.74)                 | -          | pos (5.99)                 | -          | NA                                  | -                                     | -  | -   | -  | -  | -  |
| DiaPro IgM EIA | 111                      | 18                        | -                             | neg (0.5) | -                        | pos (1.1) | -                          | pos (3.16) | -                          | pos (4.74) | NA                                  | -                                     | -  | -   | -  | -  | -  |



| <b>Total samples</b>                 | 3015 | 556 | - | - | - | - | - | - | - | - | 72 (2.4%) | 54<br>(75.0%) | 2<br>(2.8%) | 7<br>(9.7%) | - | 31<br>(43.1%) | 2<br>(2.8%) |
|--------------------------------------|------|-----|---|---|---|---|---|---|---|---|-----------|---------------|-------------|-------------|---|---------------|-------------|
| <b>Total serum<br/>samples</b>       | 1390 | 267 | - | - | - | - | - | - | - | - | 1 (0.07%) | -             | 1<br>(100%) | -           | - | -             | -           |
| <b>Total whole<br/>blood samples</b> | 1625 | 270 | - | - | - | - | - | - | - | - | 71 (4.4%) | 54<br>(76.1%) | 1<br>(1.4%) | 7<br>(9.9%) | - | 31<br>(43.7%) | 2<br>(2.8%) |

**Supplementary Table S4. Cross-reactions according to the test lines affected and test line intensities for the different RDT products.**

Data of test line reactivity are those obtained by consensus reading; data about line-intensity are those scored by observer 1. All data are %, unless otherwise stated. Invalid results are subtracted. Proportions of cross-reactions for Wantai were given as total Ig, proportions of intensities of cross-reactive lines were very faint (96.5%, faint (2.4%) and medium (1.2%) (mentioned with "\*")). Abbreviations: NA = not applicable.

| Product           | Detecting antigen | Test lines affected   |          |          |          |         | Line intensity (read by observer 1) |            |       |       |        |        |                            |            |       |      |        |        |     |     |
|-------------------|-------------------|-----------------------|----------|----------|----------|---------|-------------------------------------|------------|-------|-------|--------|--------|----------------------------|------------|-------|------|--------|--------|-----|-----|
|                   |                   |                       |          |          |          |         | IgG                                 |            |       |       |        |        | IgM                        |            |       |      |        |        |     |     |
|                   |                   | Nr of cross-reactions | IgG only | IgM only | Total Ig | IgG+IgM | Nr of cross-reactive lines          | very faint | Faint | Weak  | Medium | Strong | Nr of cross-reactive lines | Very faint | Faint | Weak | Medium | Strong |     |     |
|                   |                   |                       |          |          |          |         |                                     |            |       |       |        |        |                            |            |       |      |        |        |     |     |
| Toda              | N                 | 10                    | 10.0     | 60.0     | NA       | 30.0    | 4                                   | 25.0       | 25.0  | 50.0  | -      | -      | 6                          | 66.7       | 16.7  | 16.7 | -      | -      |     |     |
| Cellex            | N + S             | 7                     | 42.9     | 42.9     | NA       | 14.3    | 4                                   | 25.0       | 50.0  | 25.0  | -      | -      | 3                          | 66.7       | 33.3  | -    | -      | -      |     |     |
| Multi-G           | N + RBD + S       | 12                    | 16.7     | 83.3     | NA       | -       | 2                                   | -          | -     | 50.0  | 50.0   | -      | 10                         | 60.0       | 40.0  | -    | -      | -      |     |     |
| SureScreen        | N + RBD           | 12                    | 8.3      | 91.7     | NA       | -       | 1                                   | -          | 100.0 | -     | -      | -      | 11                         | 72.7       | 9.1   | 18.2 | -      | -      |     |     |
| StrongStep        | N + S             | 13                    | 7.7      | 92.3     | NA       | -       | 1                                   | -          | -     | 100.0 | -      | -      | 12                         | 58.3       | 16.7  | 25.0 | -      | -      |     |     |
| QuickZen          | RBD               | 24                    | 8.3      | 87.5     | NA       | 4.2     | 3                                   | 100.0      | -     | -     | -      | -      | 21                         | 47.6       | 33.3  | 19.0 | -      | -      |     |     |
| Biohit            | N                 | 34                    | -        | 91.2     | NA       | 8.8     | 3                                   | 33.3       | -     | 66.7  | -      | -      | 31                         | 48.4       | 19.4  | 32.3 | -      | -      |     |     |
| Singuway          | N + RBD           | 44                    | -        | 93.2     | NA       | 6.8     | 3                                   | 33.3       | 66.7  | -     | -      | -      | 41                         | 41.5       | 31.7  | 26.8 | -      | -      |     |     |
| Panbio            | N                 | 39                    | 30.8     | 59.0     | NA       | 10.3    | 16                                  | 25.0       | 25.0  | 31.3  | 18.8   | -      | 23                         | 39.1       | 39.1  | 21.7 | -      | -      |     |     |
| Dynamiker         | N + S             | 73                    | 4.1      | 84.9     | NA       | 11.0    | 11                                  | 63.6       | 9.1   | 27.3  | -      | -      | 62                         | 56.5       | 16.1  | 24.2 | 3.2    | -      |     |     |
| Healgen           | S                 | 76                    | 15.8     | 68.4     | NA       | 15.8    | 24                                  | 37.5       | 20.8  | 25.0  | 8.3    | 8.3    | 52                         | 46.2       | 25.0  | 19.2 | 7.7    | 1.9    |     |     |
| Wantai            | S                 | 85*                   | NA       | NA       | 100.0    | NA      | NA                                  | NA         | NA    | NA    | NA     | NA     | NA                         | NA         | NA    | NA   | NA     | NA     |     |     |
| Boson             | N                 | 116                   | 6.0      | 84.5     | NA       | 9.5     | 18                                  | 50.0       | 11.1  | 33.3  | 5.6    | -      | 98                         | 32.7       | 23.5  | 26.5 | 17.3   | -      |     |     |
|                   |                   |                       |          |          |          |         |                                     |            |       |       |        |        |                            |            |       |      |        |        |     |     |
| All RDTs combined |                   | 545                   | 8.1      | 67.9     | 15.6     | 8.4     |                                     | 90         | 40.0  | 20.0  | 30.0   | 7.8    | 2.2                        |            | 370   | 45.7 | 24.3   | 23.5   | 6.2 | 0.3 |
